# Supplementary material for: Change and stasis of distinct sediment microbiomes across Port Everglades Inlet (PEI) and the adjacent coral reefs
Source: PeerJ journal article supplement (doi:10.7717/peerj.14288), 2023-01-13

2D Stress: 0.1

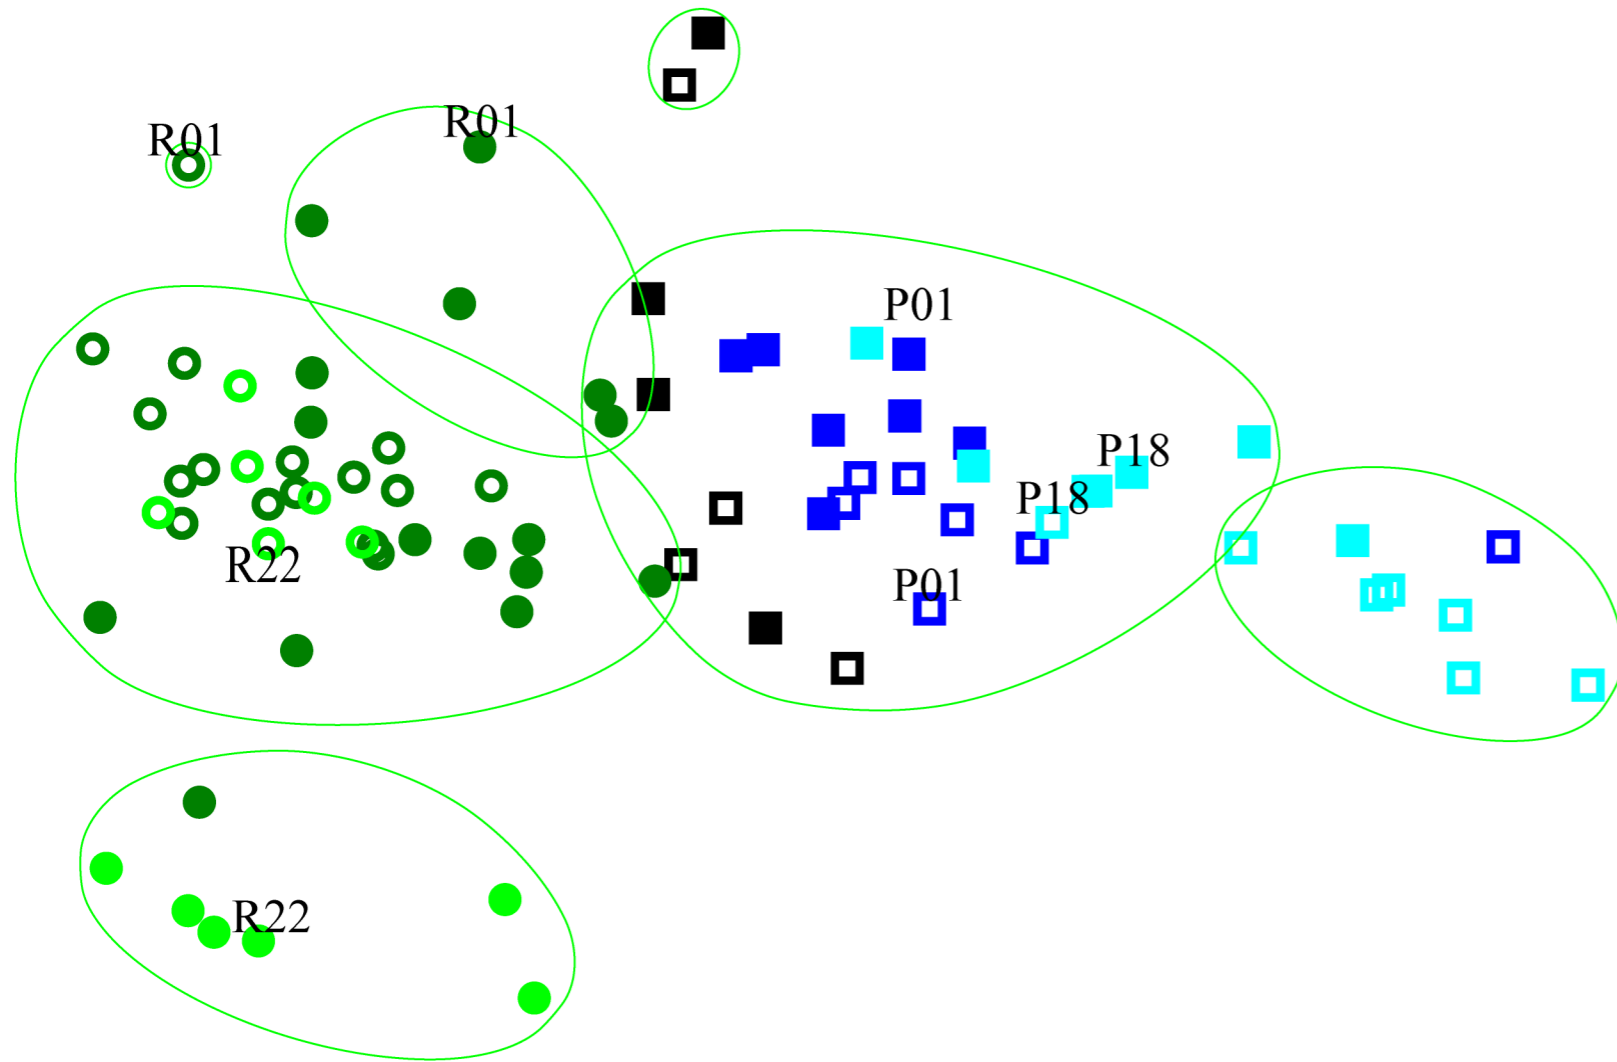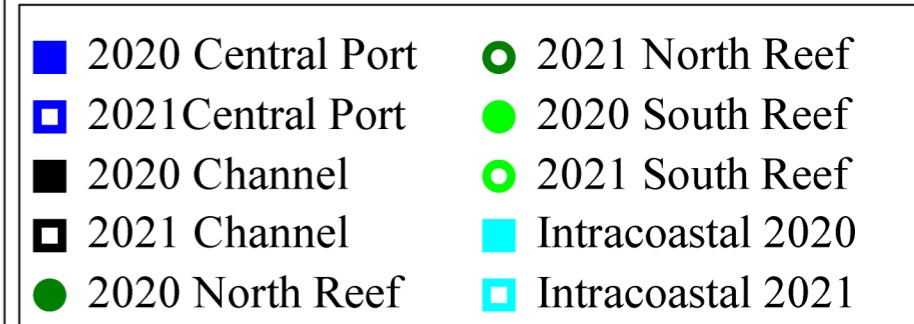

Supplement: Figure_S1.pdf [file Figure_S1.pdf]
